# Supplementary material for: A mild and metal-free synthesis of 2- and 1-alkyl/aryl/dialkyl-aminoquinolines and isoquinolines
Source: Royal Society of Chemistry journal article supplement (doi:10.1039/c9ra10397j), 2020-01-01
Supplement: c9ra10397j1.pdf [file c9ra10397j1.pdf]

## **A Mild and Metal-Free Synthesis of 2 and 1-Alkyl/Aryl/Dialkyl- Aminoquinolines and Isoquinolines**

Yerramsetti Nanaji,<sup>a</sup> Seema Kirar,<sup>b</sup> Sandip V. Pawar,<sup>c\*</sup> Ashok Kumar Yadav<sup>c\*</sup>

<sup>a</sup> Texas Tech University Health Sciences Center, Ophthalmology Dept Lbk Genl, Lubbock, Texas, USA, 3601 4th Street, Lubbock TX 79430

<sup>b</sup> Department of Biotechnology, National Institute of Pharmaceutical Education and Research (NIPER), Sector-67, S.A.S. Nagar-160062, Punjab, India

<sup>c</sup> University Institute of Pharmaceutical Sciences, Panjab University, Chandigarh, India-160014  
Fax: +91-172-2543101; phone: +91-172-2541142; e-mail: [pawars@pu.ac.in](mailto:pawars@pu.ac.in); [ashoky@pu.ac.in](mailto:ashoky@pu.ac.in)

### **<sup>1</sup>H and <sup>13</sup>C Spectra**

## 4-(Quinolin-2-yl)morpholine 5a

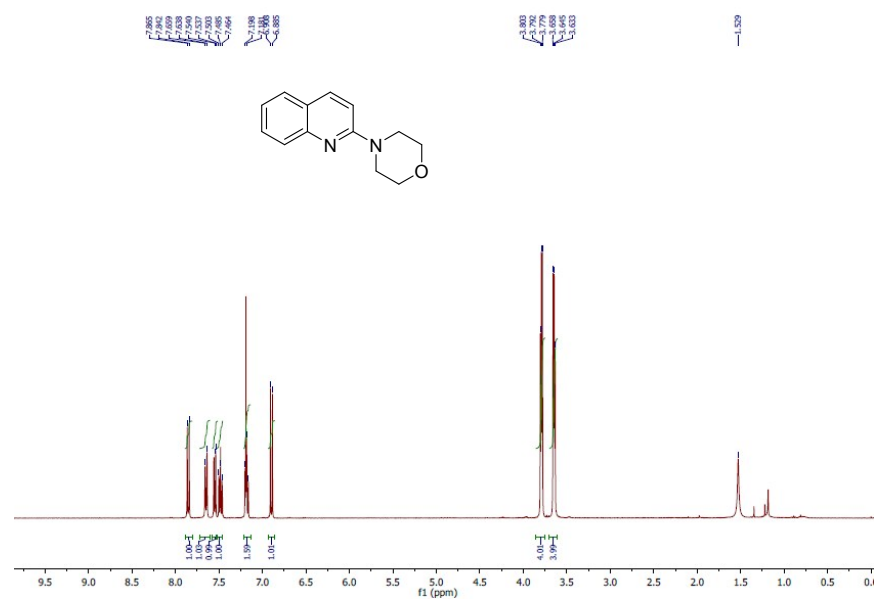

<sup>1</sup>H NMR (400 MHz, CDCl<sub>3</sub>) spectra of 4-(Quinolin-2-yl)morpholine 5a

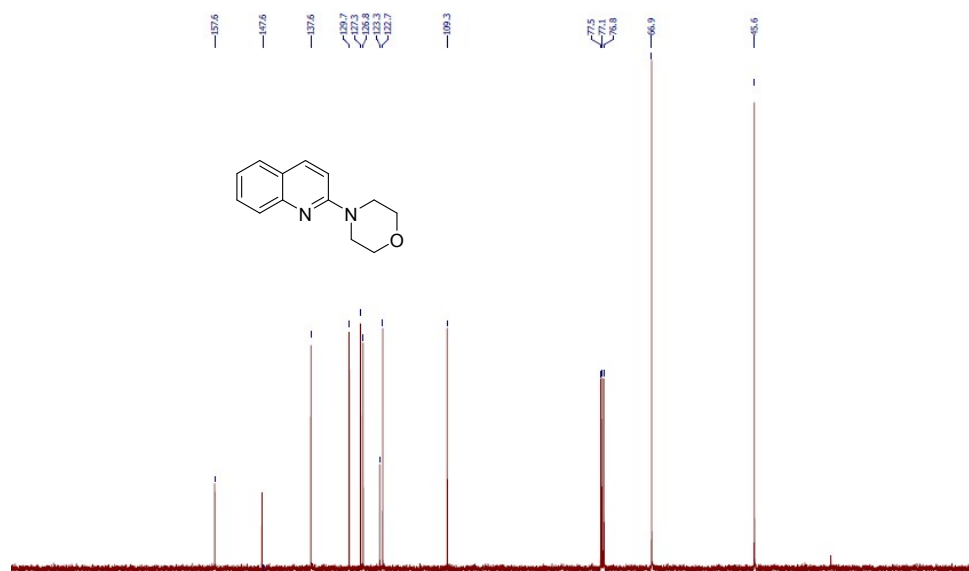

<sup>13</sup>C NMR (101 MHz, CDCl<sub>3</sub>) spectra of 4-(Quinolin-2-yl)morpholine 5a

## 2-(Piperidin-1-yl)quinoline 5b

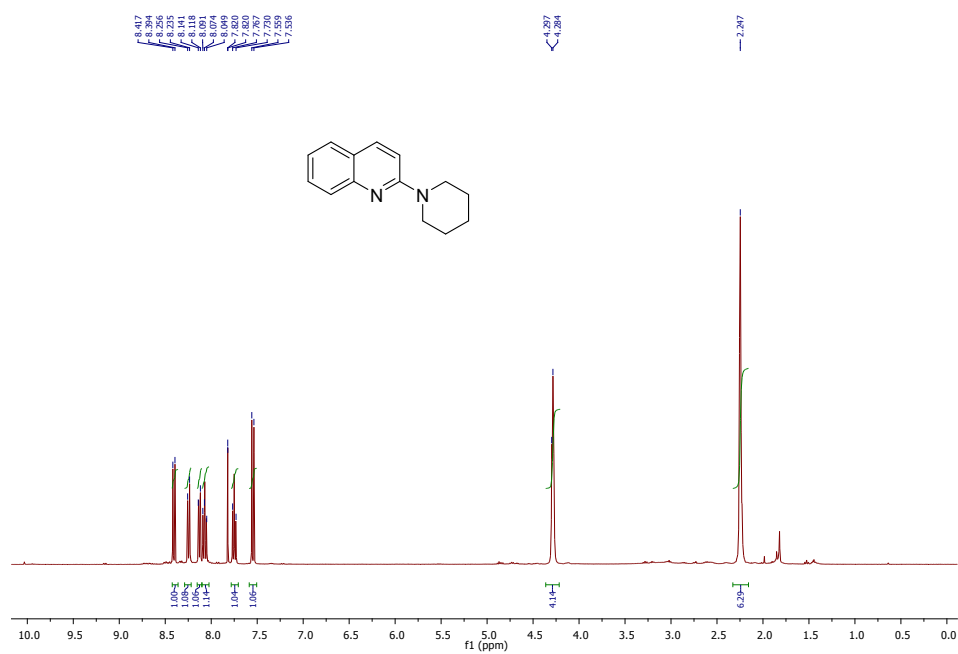

<sup>1</sup>H NMR (400 MHz, CDCl<sub>3</sub>) spectra of 2-(Piperidin-1-yl)quinoline 5b

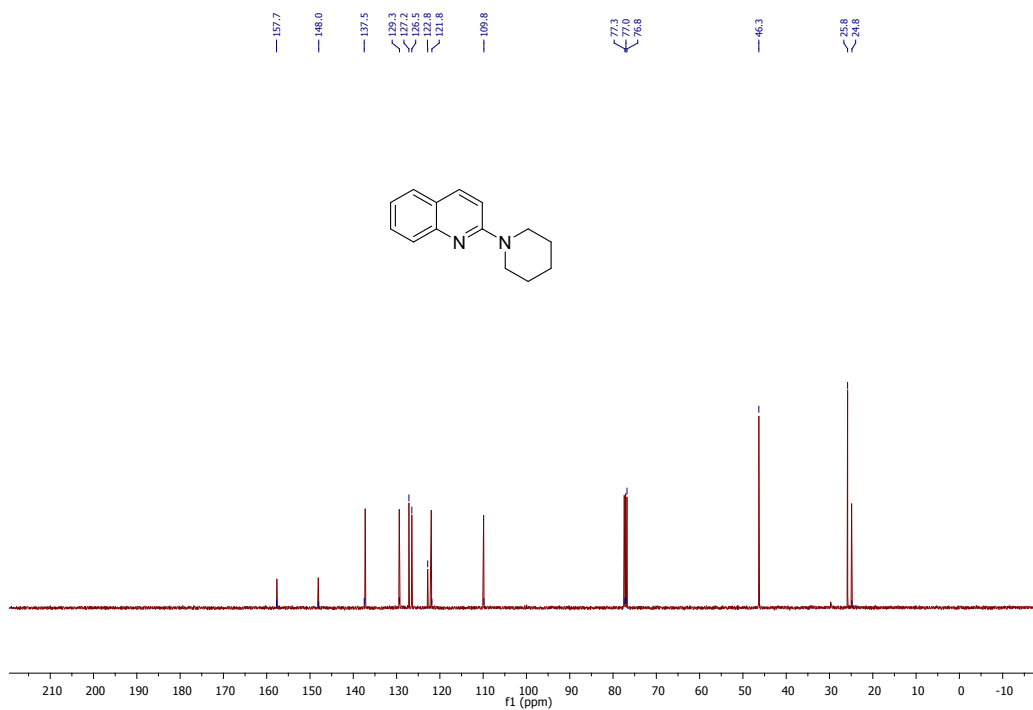

<sup>13</sup>C NMR (101 MHz, CDCl<sub>3</sub>) spectra of 2-(Piperidin-1-yl)quinoline 5b

## *N*-Butylquinolin-2-amine 5c

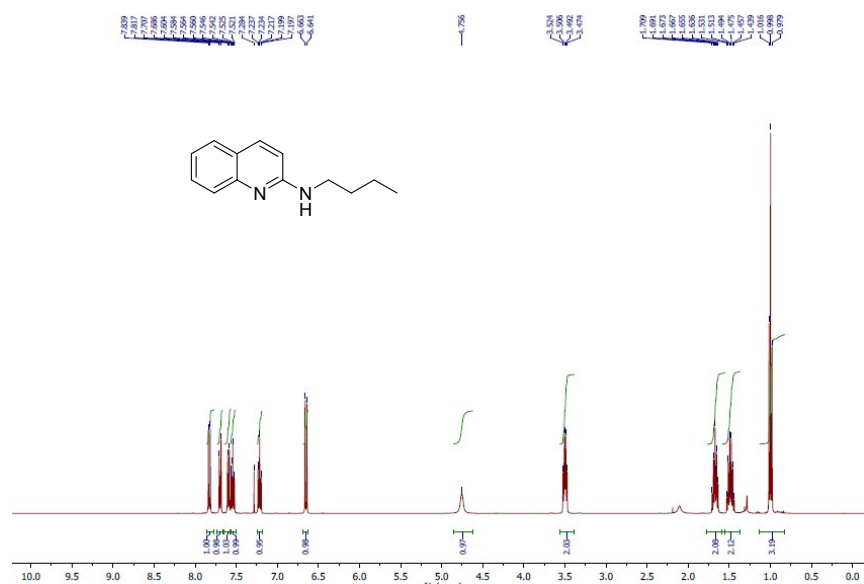

<sup>1</sup>H NMR (400 MHz, CDCl<sub>3</sub>) spectra of *N*-Butylquinolin-2-amine 5c

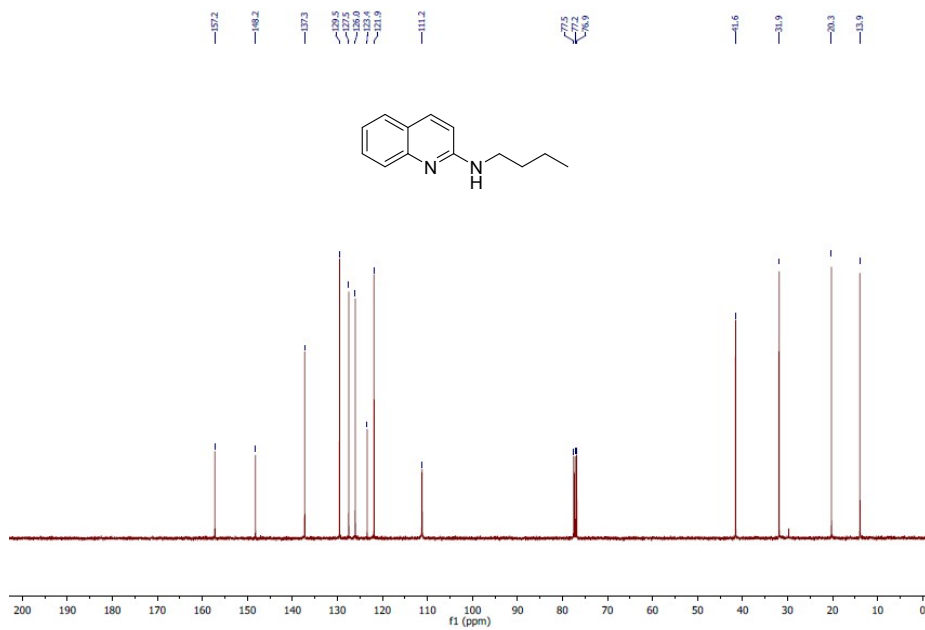

<sup>13</sup>C NMR (101 MHz, CDCl<sub>3</sub>) spectra of *N*-Butylquinolin-2-amine 5c

***N*-Benzylquinolin-2-amine 5d**

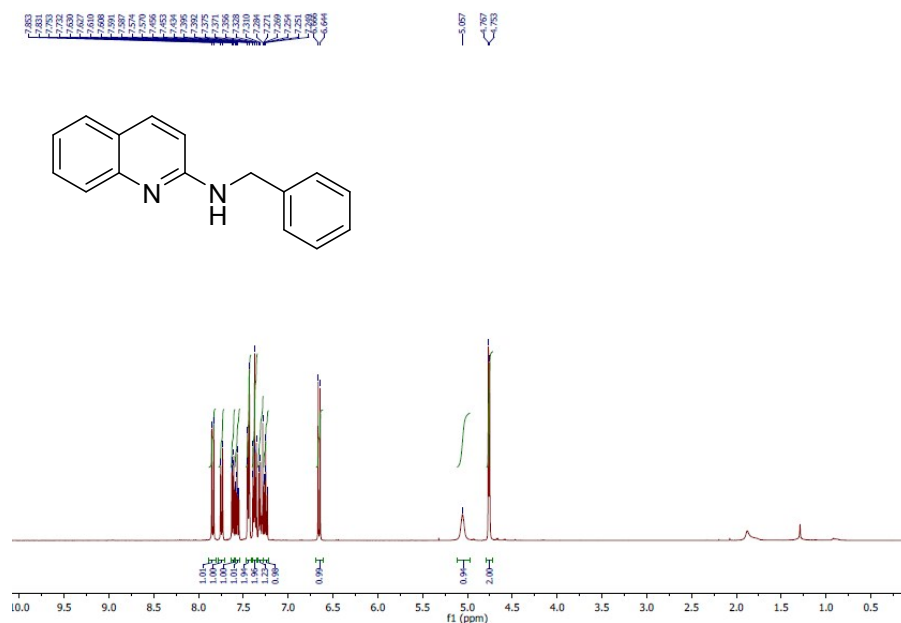

**<sup>1</sup>H NMR (400 MHz, CDCl<sub>3</sub>) spectra of *N*-Benzylquinolin-2-amine 5d**

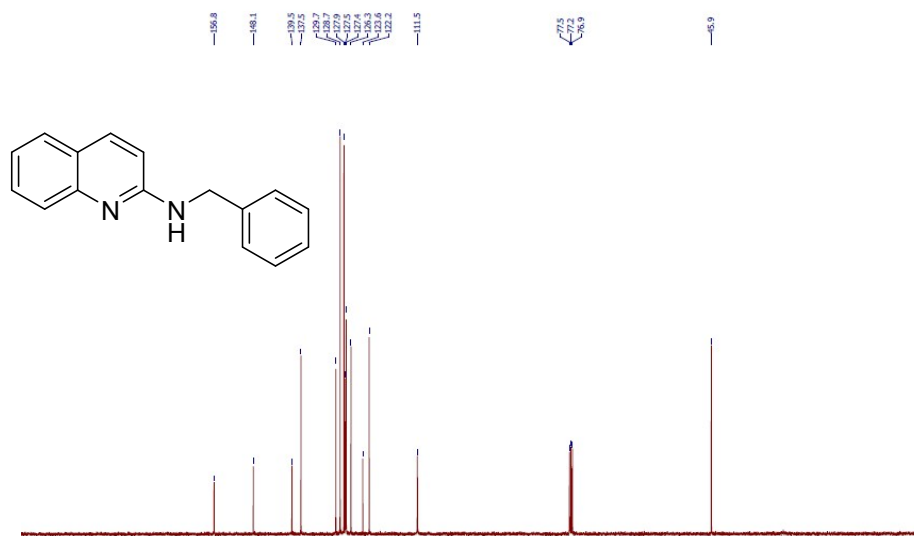

**<sup>13</sup>C NMR (101 MHz, CDCl<sub>3</sub>) spectra of *N*-Benzylquinolin-2-amine 5d**

*N-t*-Butylquinolin-2-amine **5e**

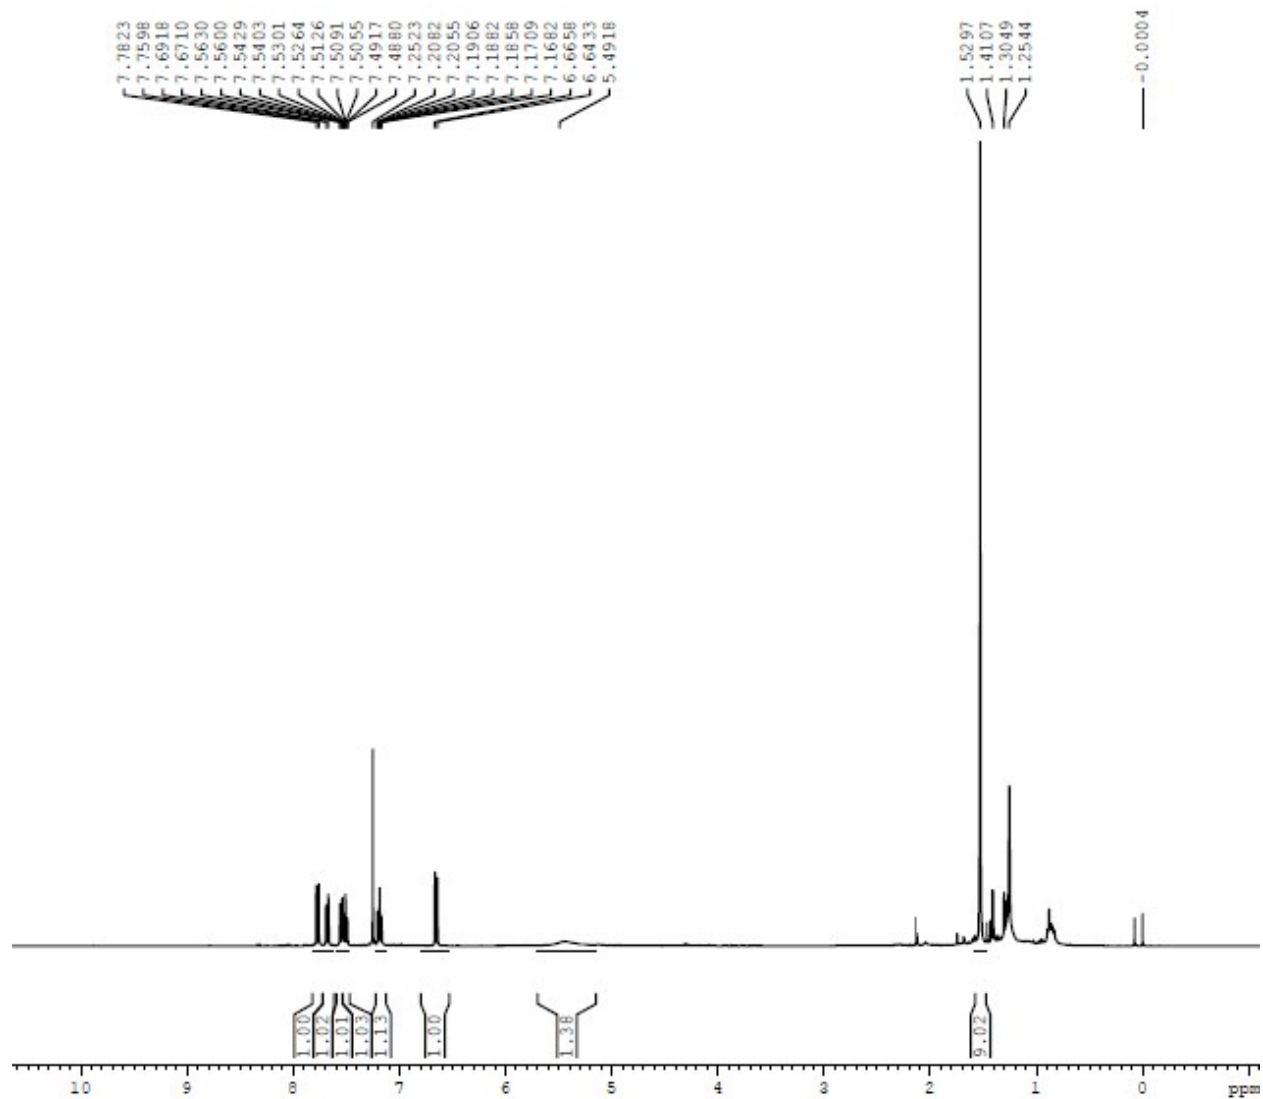

$^1\text{H}$  NMR (400 MHz,  $\text{CDCl}_3$ ) spectra of *N-t*-Butylquinolin-2-amine **5e**

# *N*-Benzyl-*N*-Methylquinolin-2-amine 5f

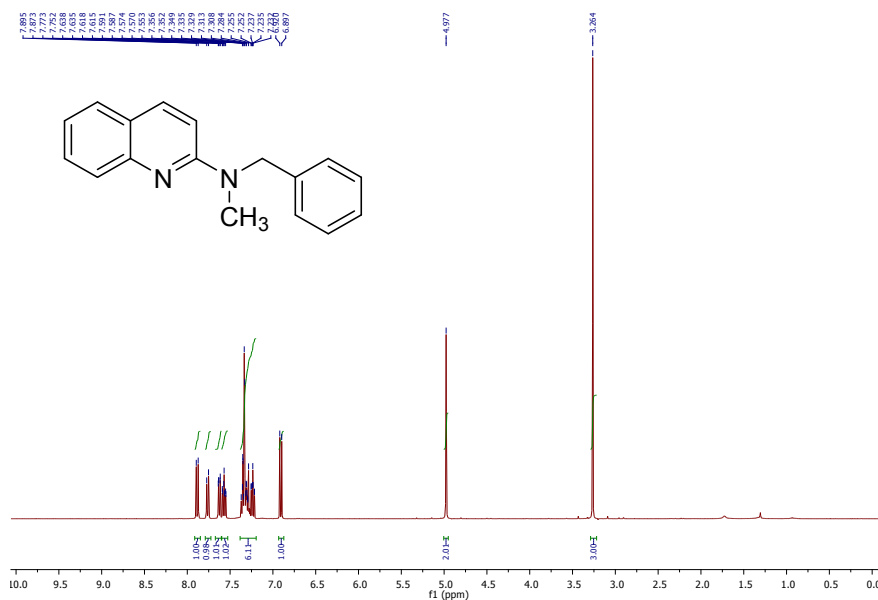

<sup>1</sup>H NMR (400 MHz, CDCl<sub>3</sub>) spectra of *N*-Benzyl-*N*-Methylquinolin-2-amine 5f

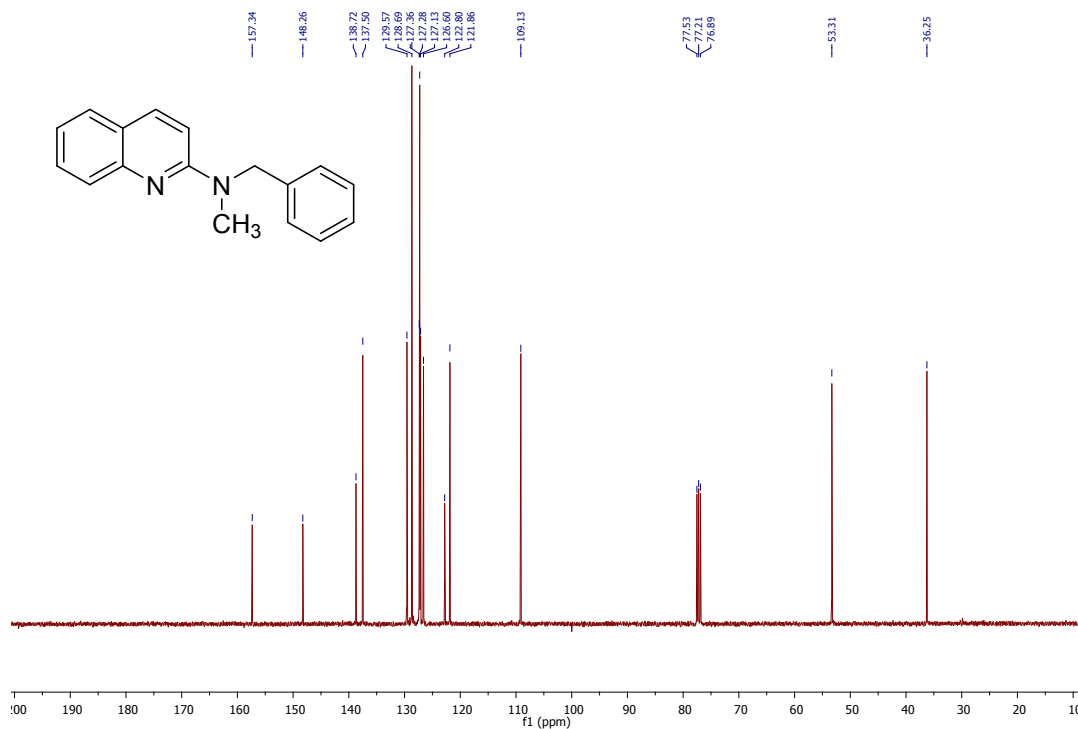

<sup>13</sup>C NMR (101 MHz, CDCl<sub>3</sub>) spectra of *N*-Benzyl-*N*-Methylquinolin-2-amine 5f

### *N,N*-Dibenzylquinolin-2-amine **5g**

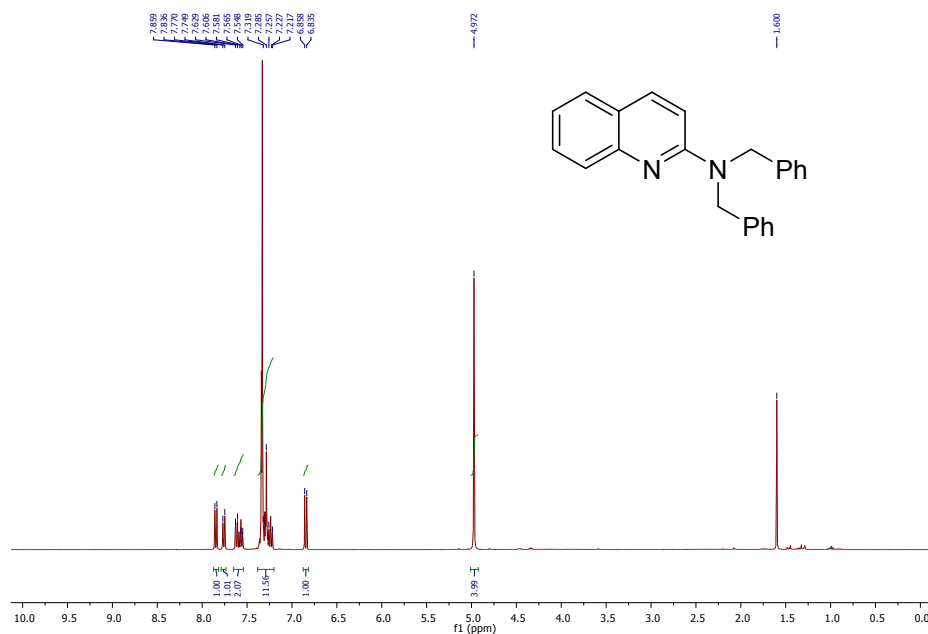

<sup>1</sup>H NMR (400 MHz, CDCl<sub>3</sub>) spectra of *N,N*-Dibenzylquinolin-2-amine **5g**

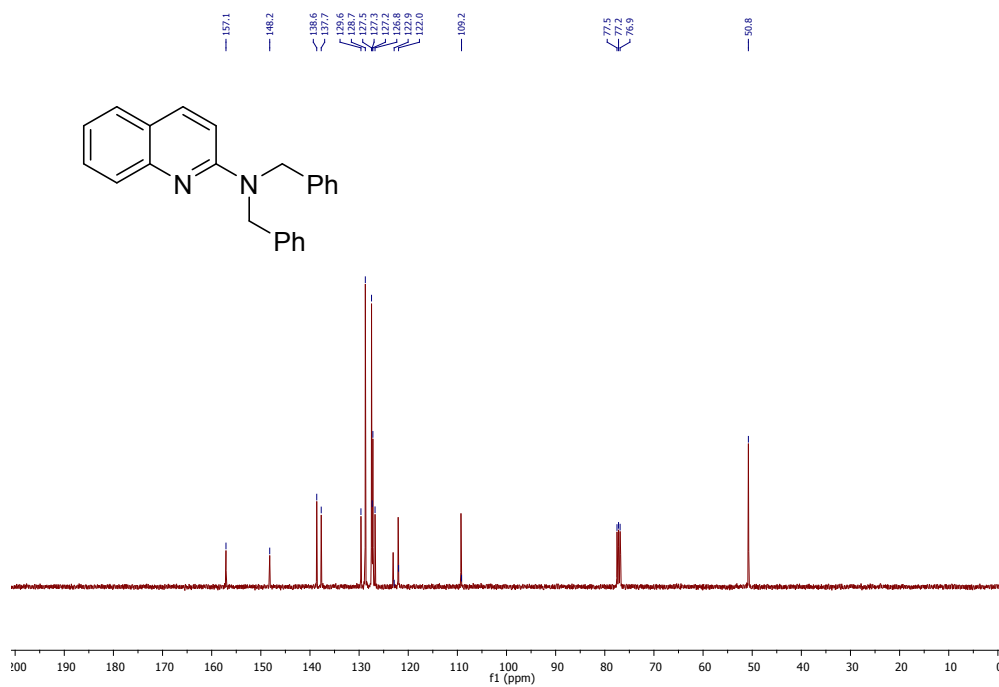

<sup>13</sup>C NMR (101 MHz, CDCl<sub>3</sub>) spectra of *N,N*-Dibenzylquinolin-2-amine **5g**



## *N*-Phenylquinolin-2-amine 5h

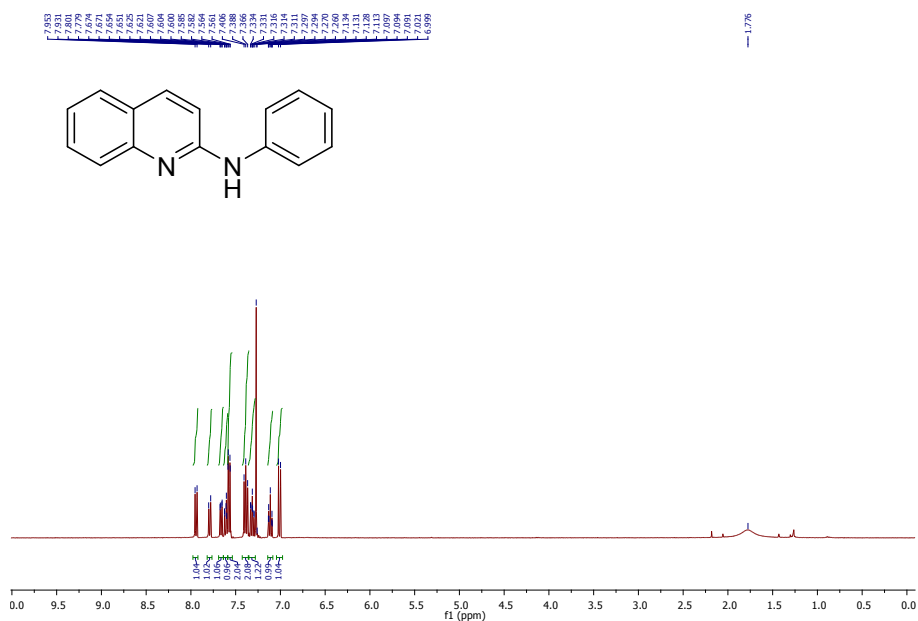

<sup>1</sup>H NMR (400 MHz, CDCl<sub>3</sub>) spectra of *N*-Phenylquinolin-2-amine 5h

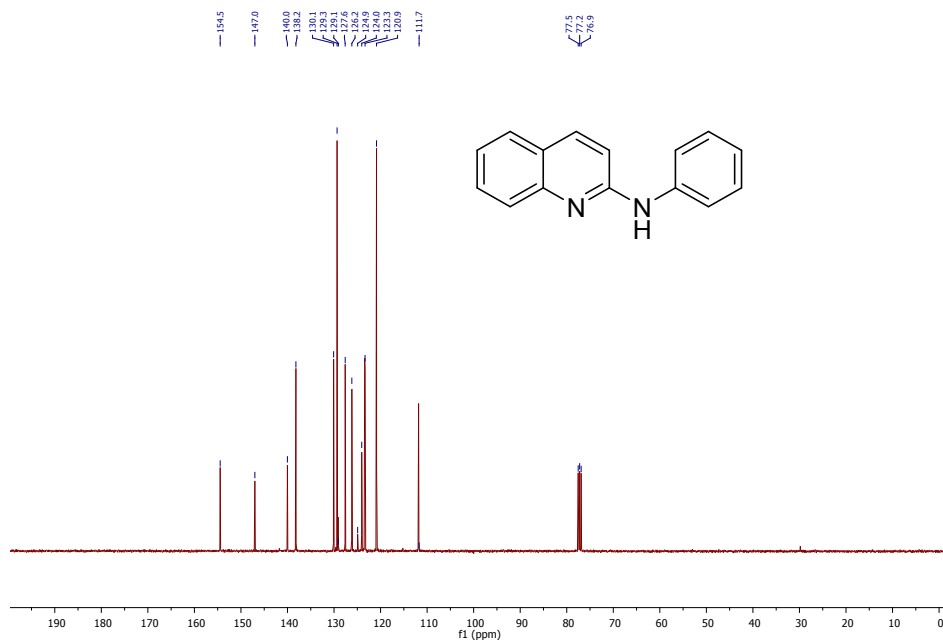

<sup>13</sup>C NMR (101 MHz, CDCl<sub>3</sub>) spectra of *N*-Phenylquinolin-2-amine 5h

# *N*-(4-Bromophenyl)quinolin-2-amine 5i

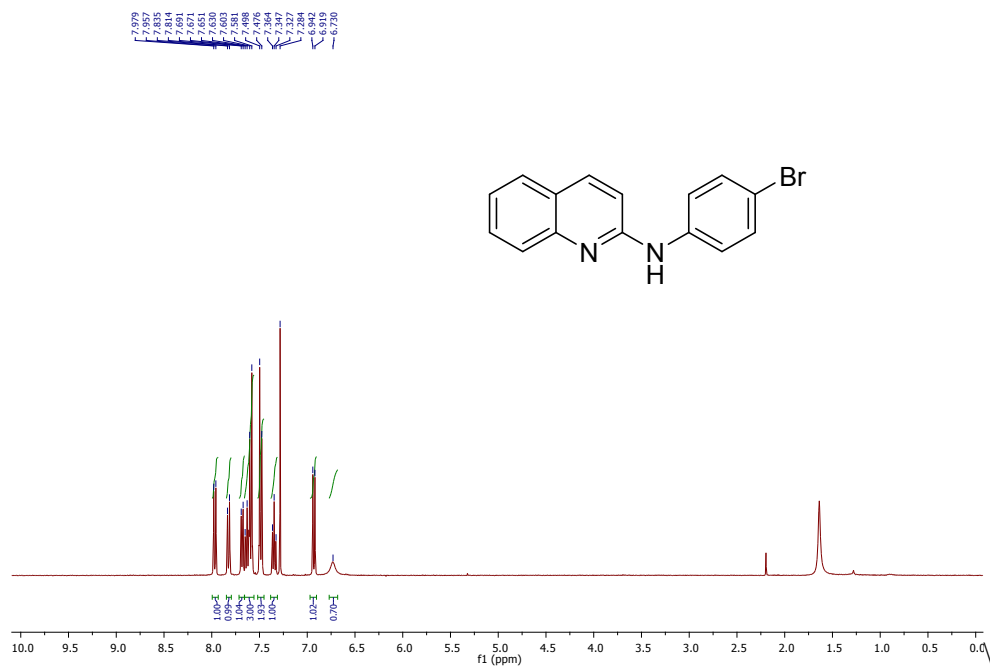

<sup>1</sup>H NMR (400 MHz, CDCl<sub>3</sub>) spectra of *N*-(4-Bromophenyl)quinolin-2-amine 5i

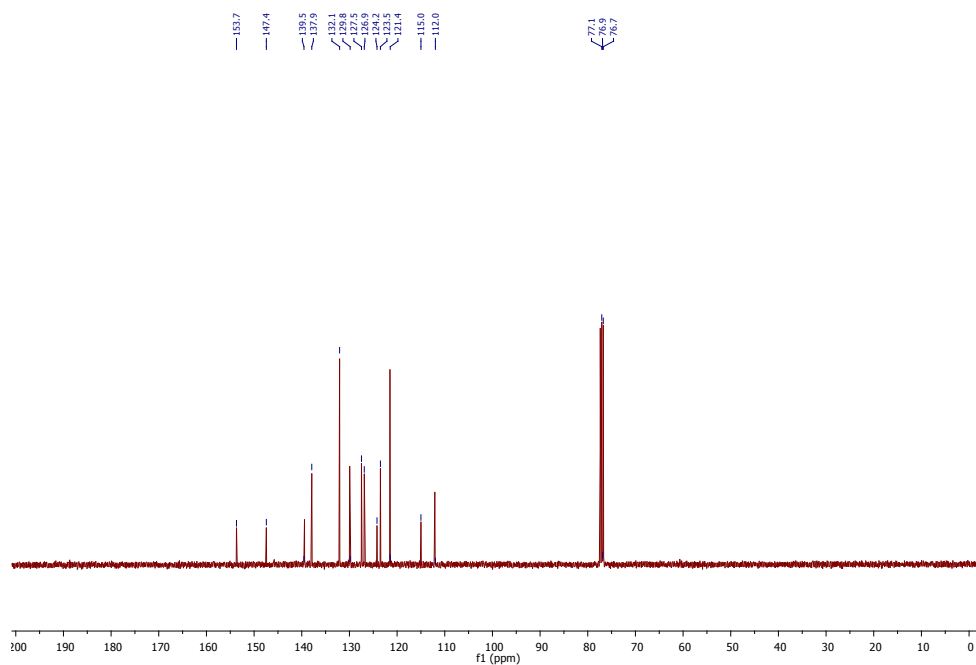

<sup>13</sup>C NMR (101 MHz, CDCl<sub>3</sub>) spectra of *N*-(4-Bromophenyl)quinolin-2-amine 5i

### *N*-(4-Methoxyphenyl)quinolin-2-amine **5j**

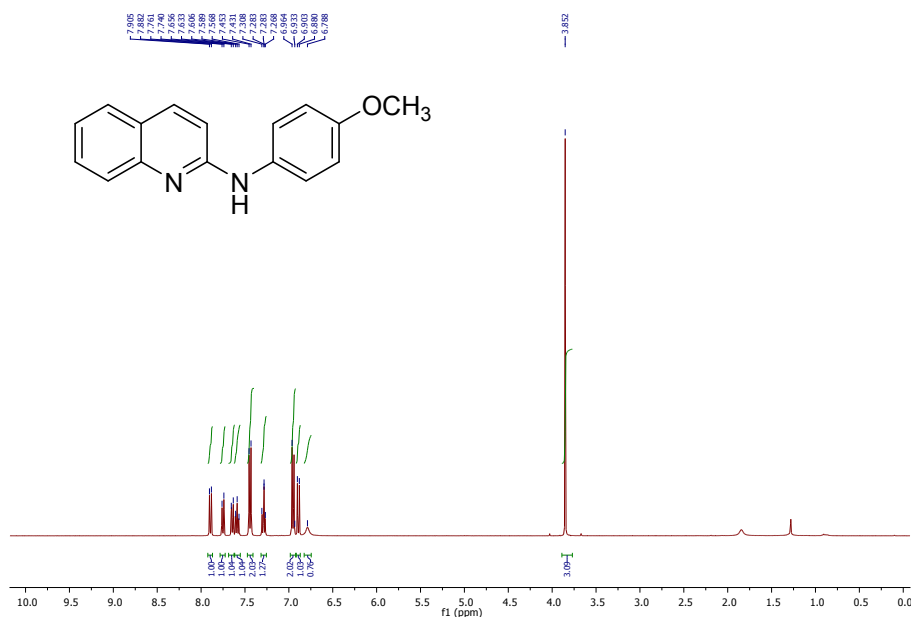

<sup>1</sup>H NMR (400 MHz, CDCl<sub>3</sub>) spectra of *N*-(4-Methoxyphenyl)quinolin-2-amine **5j**

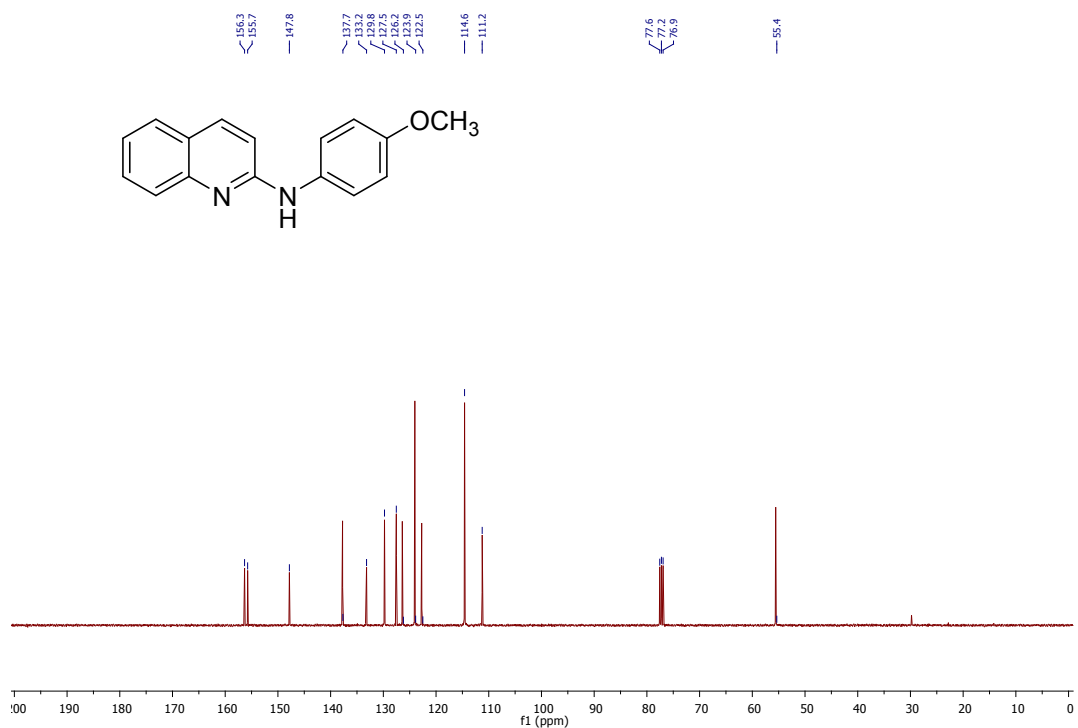

<sup>13</sup>C NMR (101 MHz, CDCl<sub>3</sub>) spectra of *N*-(4-Methoxyphenyl)quinolin-2-amine **5j**

## *N*-(4-Fluorophenyl)quinolin-2-amine 5k

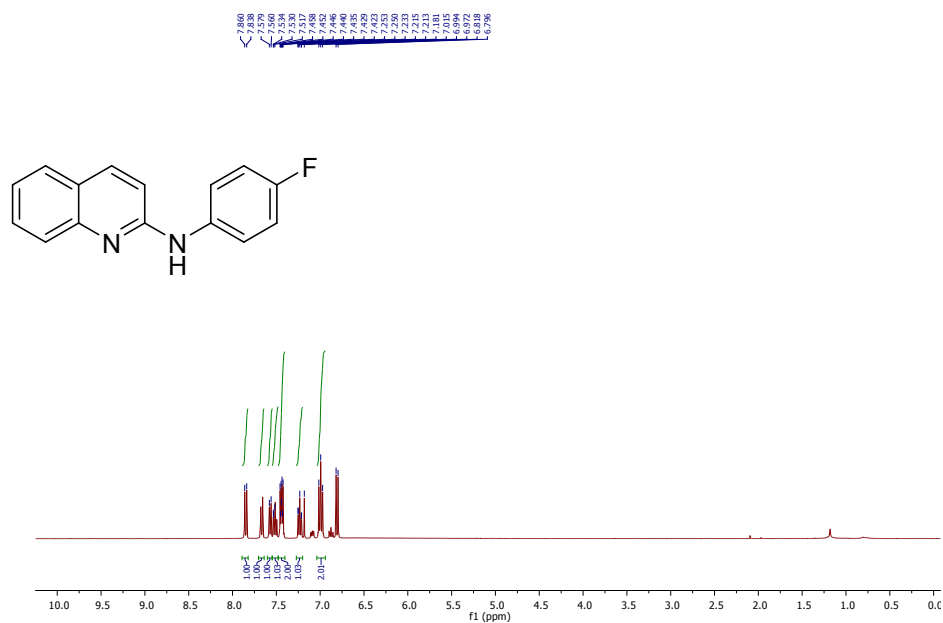

## <sup>1</sup>H NMR (400 MHz, CDCl<sub>3</sub>) spectra of *N*-(4-Fluorophenyl)quinolin-2-amine 5k

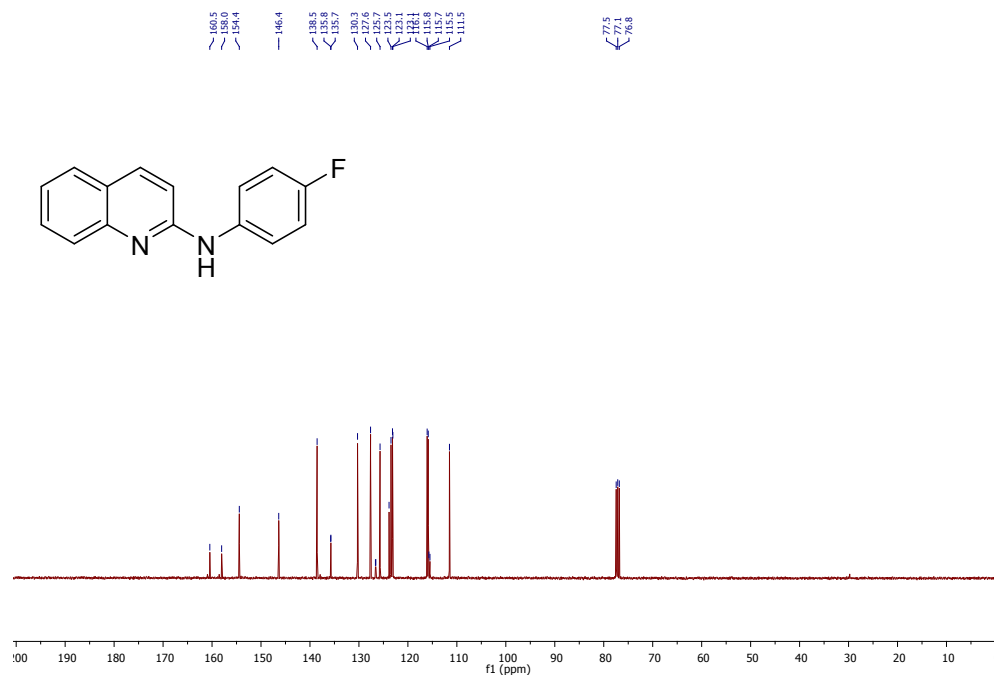

## <sup>13</sup>C NMR (101 MHz, CDCl<sub>3</sub>) spectra of *N*-(4-Fluorophenyl)quinolin-2-amine 5k

### *N*-(4-Nitrophenyl)quinolin-2-amine 5l

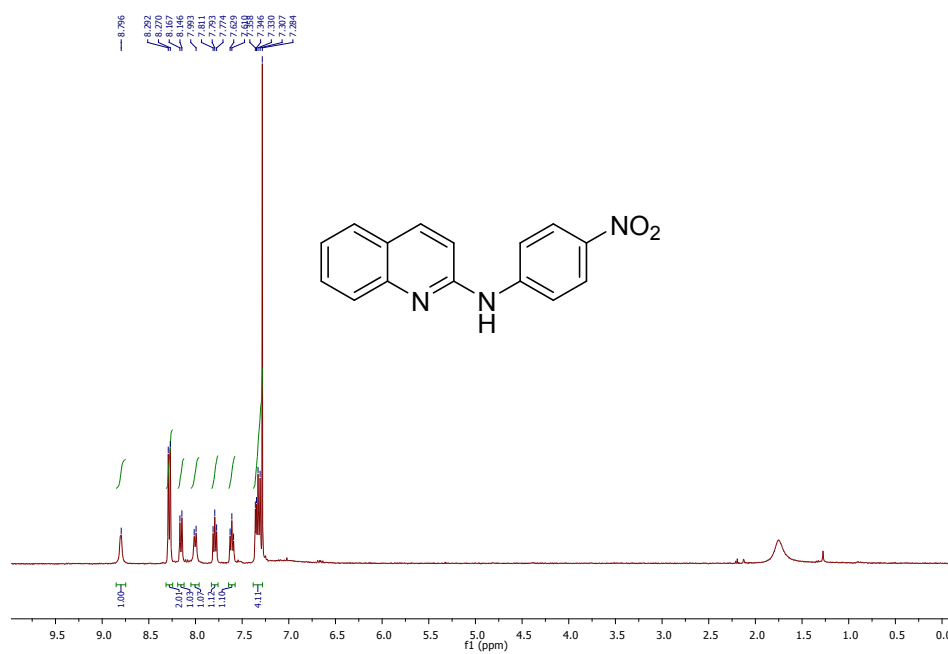

<sup>1</sup>H NMR (400 MHz, CDCl<sub>3</sub>) spectra of *N*-(4-Nitrophenyl)quinolin-2-amine 5l

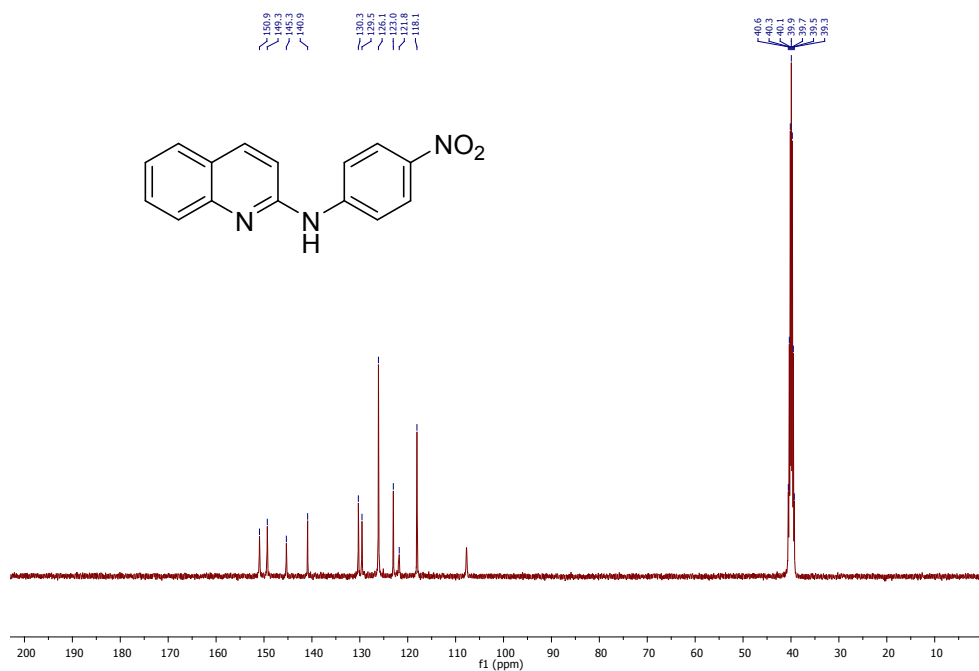

<sup>13</sup>C NMR (101 MHz, DMSO-*d*<sub>6</sub>) spectra of *N*-(4-Nitrophenyl)quinolin-2-amine 5l

## 4-(6-Methoxyquinolin-2-yl)morpholine 7a

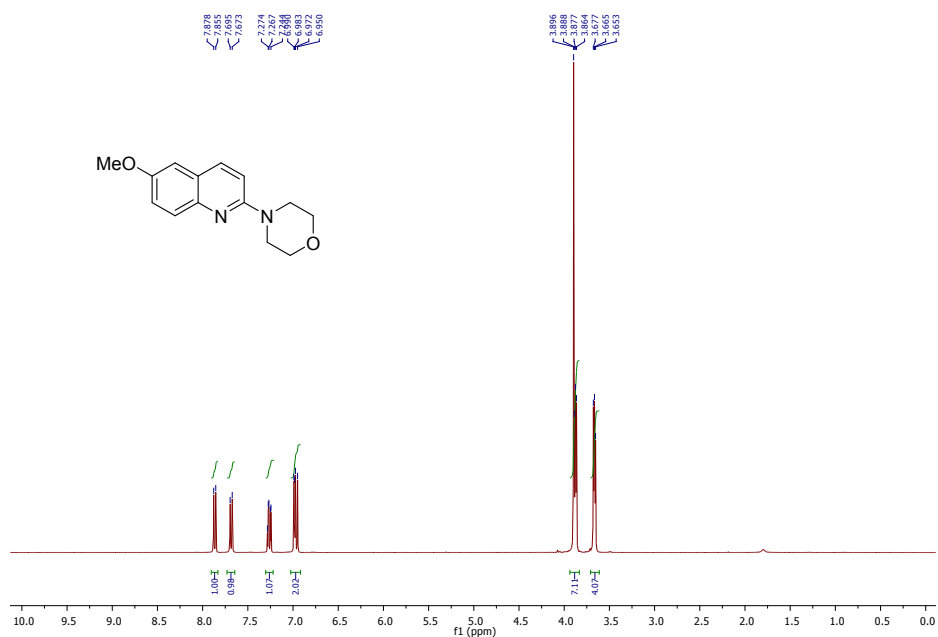

<sup>1</sup>H NMR (400 MHz, CDCl<sub>3</sub>) of 4-(6-Methoxyquinolin-2-yl)morpholine 7a

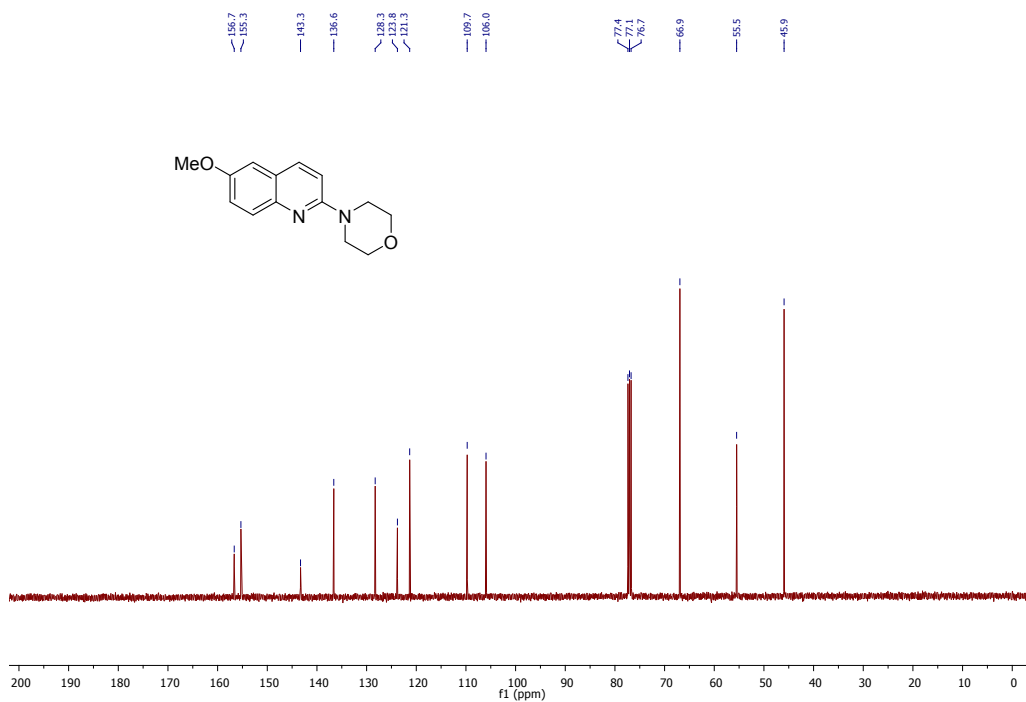

<sup>13</sup>C NMR (101 MHz, CDCl<sub>3</sub>) of 4-(6-Methoxyquinolin-2-yl)morpholine 7a

## *N*-Butyl-6-methoxyquinolin-2-amine 7b

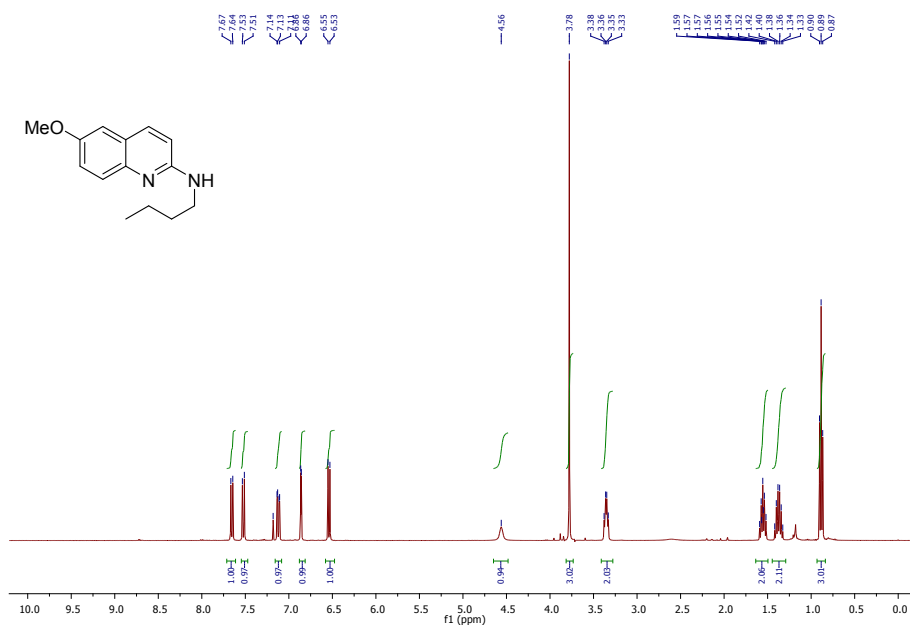

<sup>1</sup>H NMR (400 MHz, CDCl<sub>3</sub>) of *N*-Butyl-6-methoxyquinolin-2-amine 7b

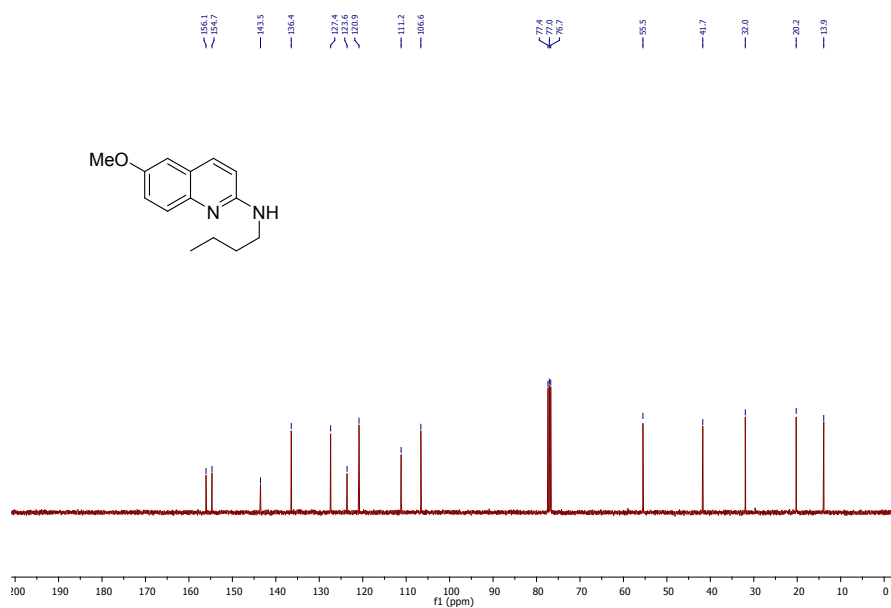

<sup>13</sup>C NMR (101 MHz, CDCl<sub>3</sub>) of *N*-Butyl-6-methoxyquinolin-2-amine 7b

### *N*-Benzyl-6-methoxy-*N*-methylquinolin-2-amine 7c

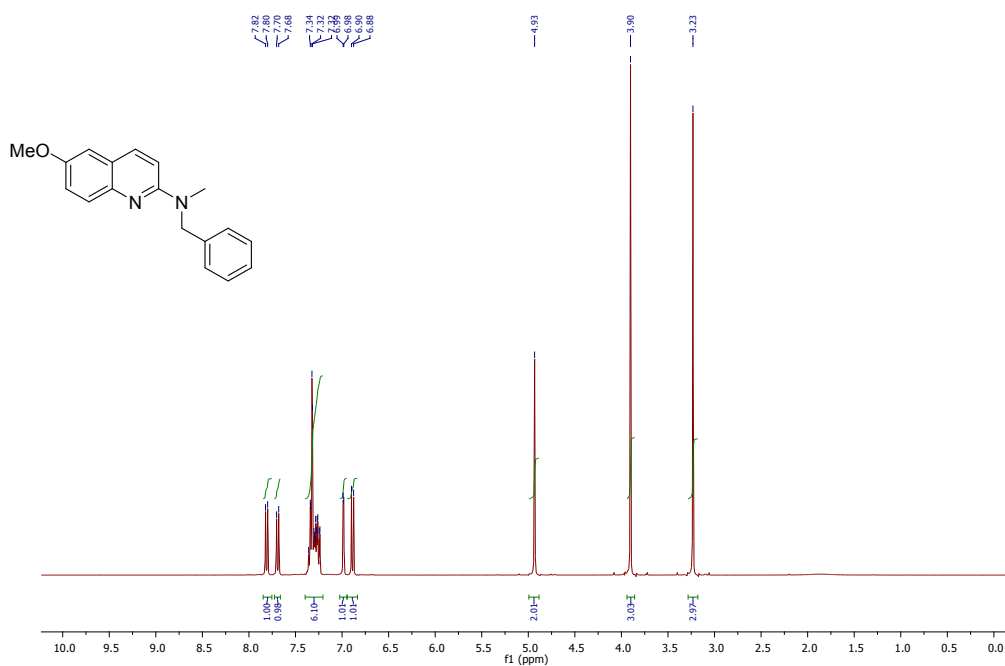

<sup>1</sup>H NMR (400 MHz, CDCl<sub>3</sub>) of *N*-Benzyl-6-methoxy-*N*-methylquinolin-2-amine 7c

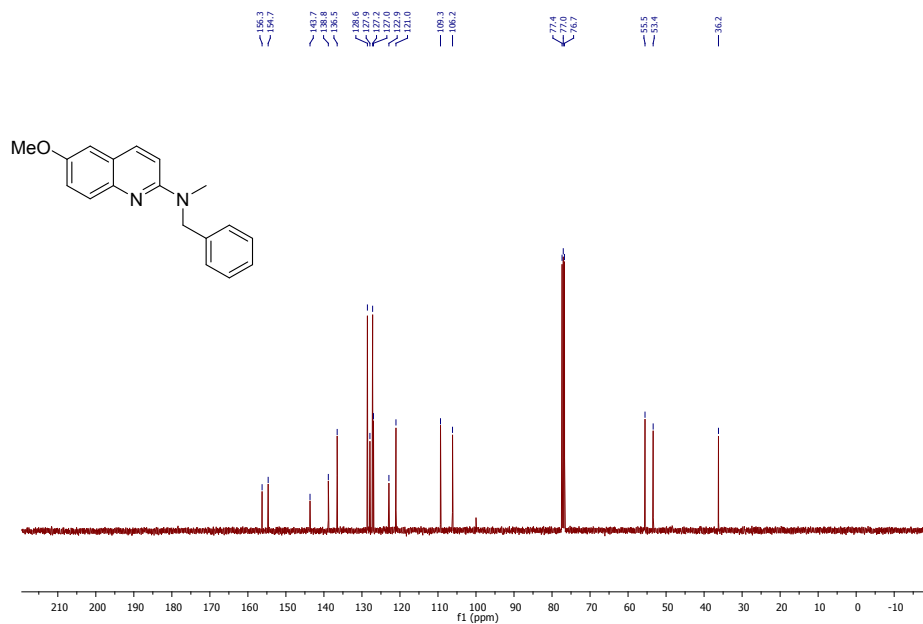

<sup>13</sup>C NMR (101 MHz, CDCl<sub>3</sub>) of *N*-Benzyl-6-methoxy-*N*-methylquinolin-2-amine 7c



## 6-Methoxy-*N*-phenylquinolin-2-amine 7d

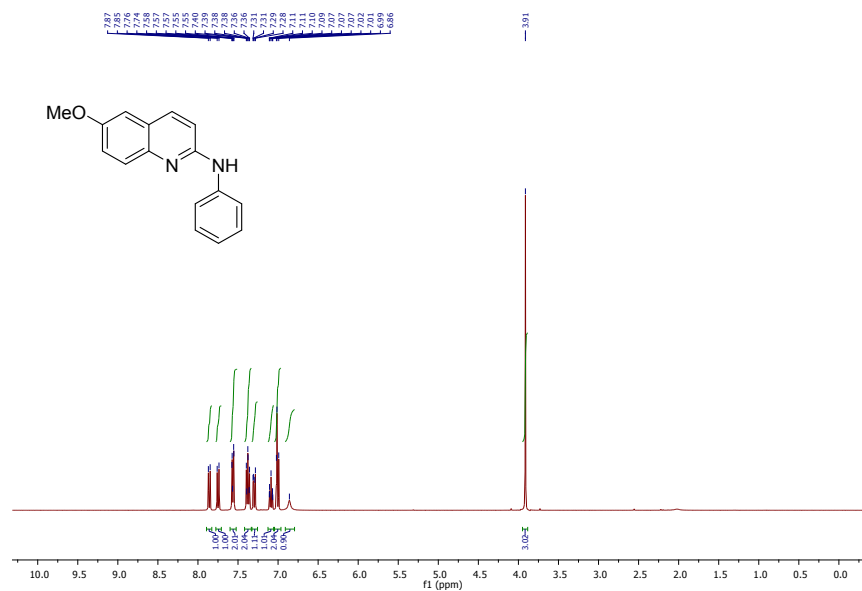

<sup>1</sup>H NMR (400 MHz, CDCl<sub>3</sub>) of 6-Methoxy-*N*-phenylquinolin-2-amine 7d

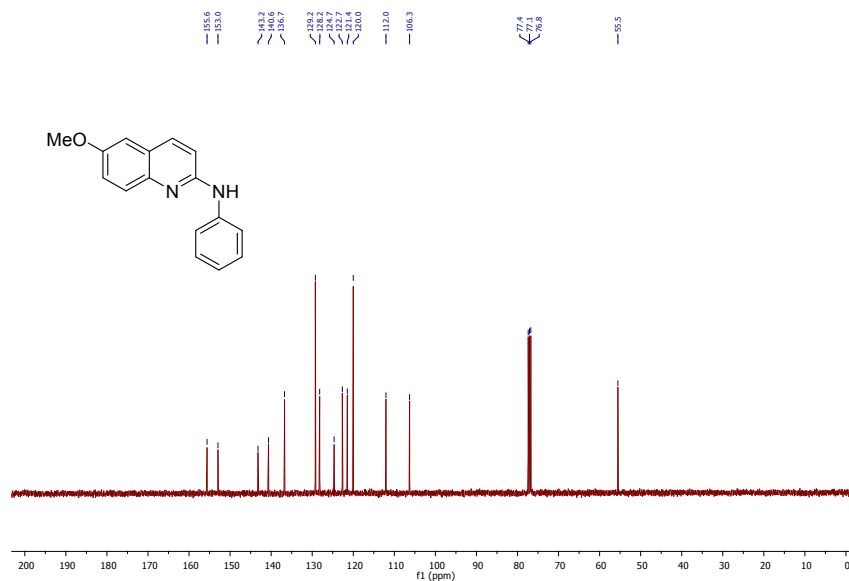

<sup>13</sup>C NMR (101 MHz, CDCl<sub>3</sub>) of 6-Methoxy-*N*-phenylquinolin-2-amine 7d

## 6-Methoxy-*N*-(4-methoxyphenyl)quinolin-2-amine 7e

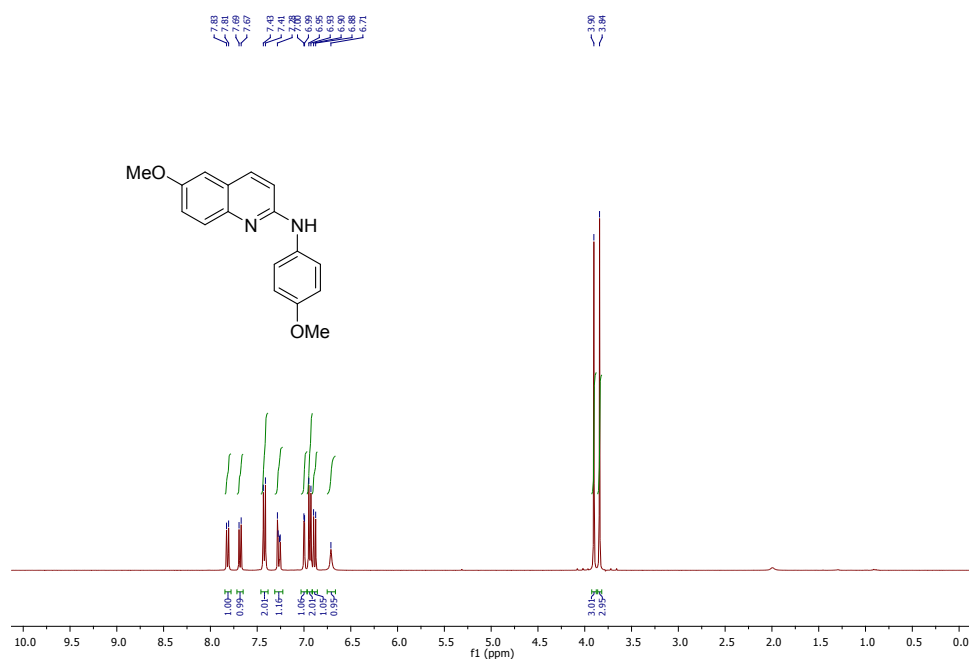

<sup>1</sup>H NMR (400 MHz, CDCl<sub>3</sub>) of 6-Methoxy-*N*-(4-methoxyphenyl)quinolin-2-amine 7e

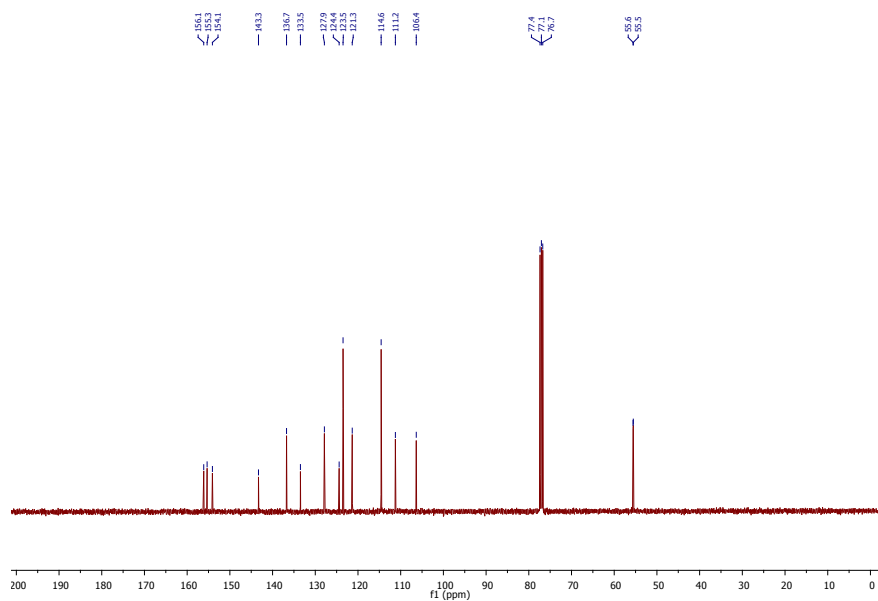

<sup>13</sup>C NMR (101 MHz, CDCl<sub>3</sub>) of 6-Methoxy-*N*-(4-methoxyphenyl)quinolin-2-amine 7e

## 6-Methoxy-*N*-(4-nitrophenyl)quinolin-2-amine 7f

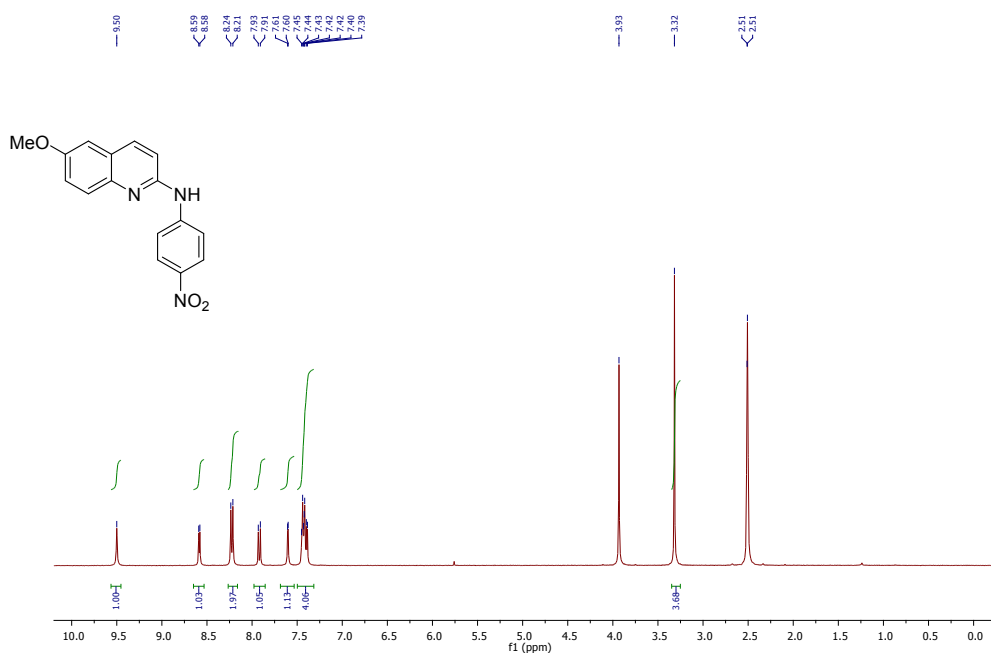

## <sup>1</sup>H NMR (400 MHz, DMSO-*d*<sub>6</sub>) of 6-Methoxy-*N*-(4-nitrophenyl)quinolin-2-amine 7f

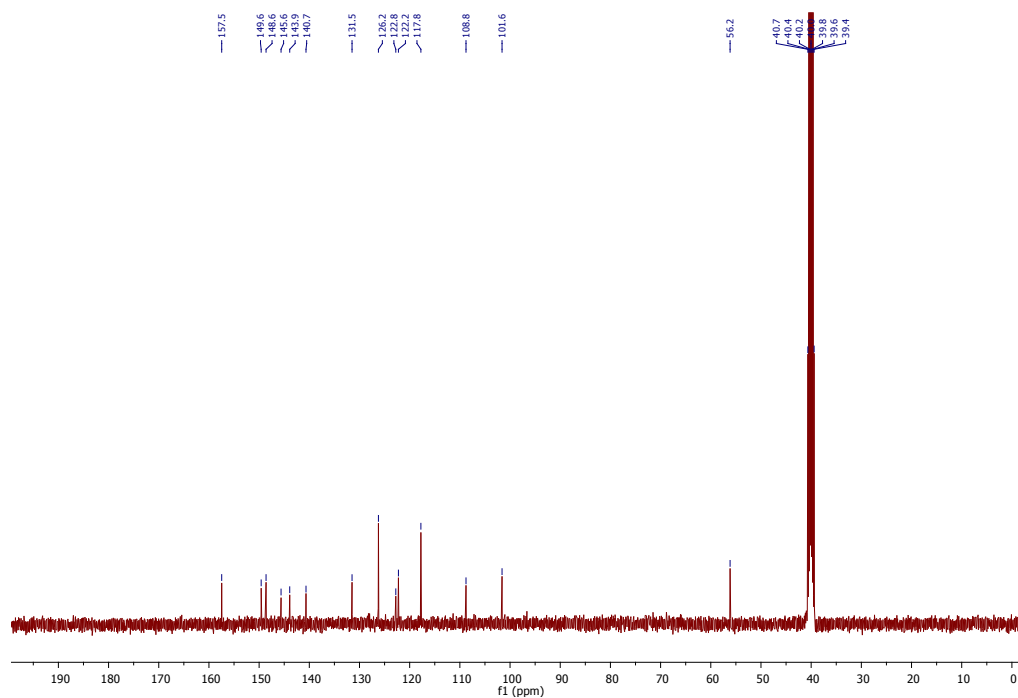

## <sup>13</sup>C NMR (101 MHz, DMSO-*d*<sub>6</sub>) of 6-Methoxy-*N*-(4-nitrophenyl)quinolin-2-amine 7f

## 4-(Isoquinolin-1-yl)morpholine 9a

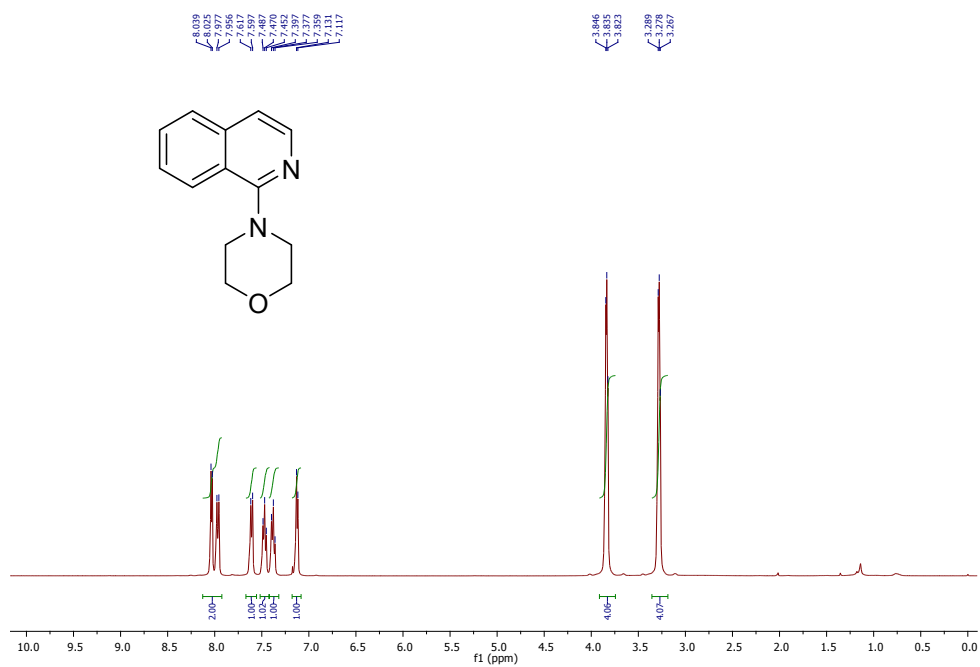

<sup>1</sup>H NMR (400 MHz, CDCl<sub>3</sub>) spectra of 4-(Isoquinolin-1-yl)morpholine 9a

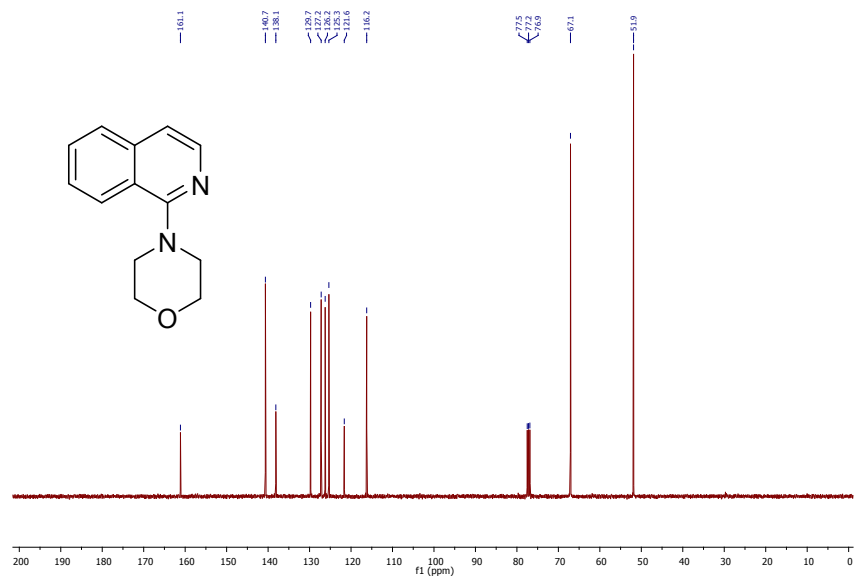

<sup>13</sup>C NMR (101 MHz, CDCl<sub>3</sub>) spectra of 4-(Isoquinolin-1-yl)morpholine 9a

## *N*-Butylisoquinolin-1-amine 9b

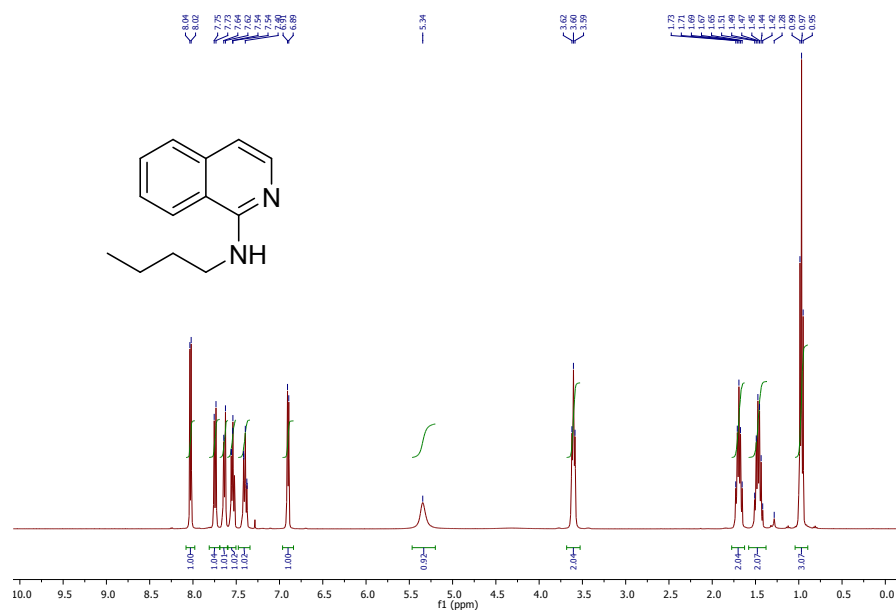

<sup>1</sup>H NMR (400 MHz, CDCl<sub>3</sub>) spectra of *N*-Butylisoquinolin-1-amine 9b

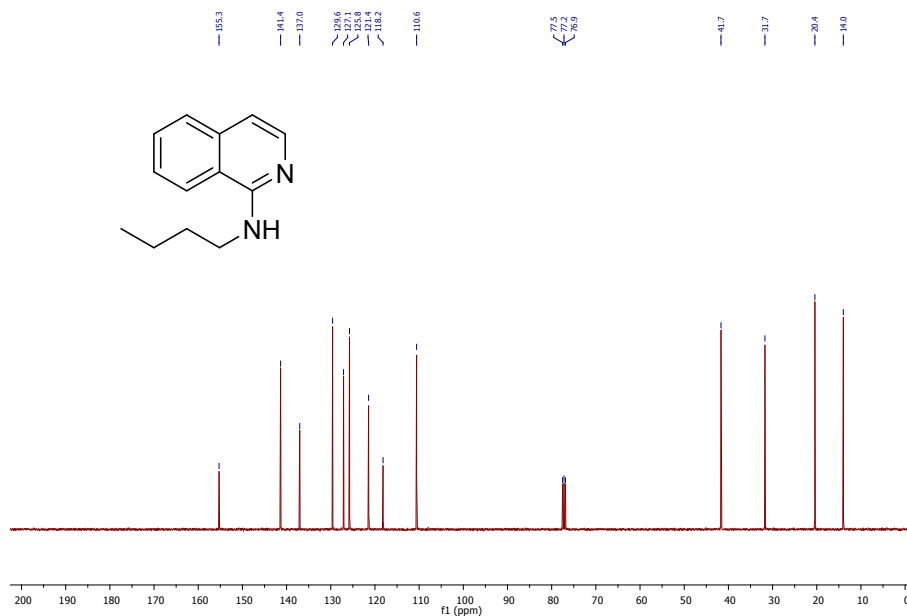

<sup>13</sup>C NMR (101 MHz, CDCl<sub>3</sub>) spectra of *N*-Butylisoquinolin-1-amine 9b

## *N*-Benzyl-*N*-Methylisoquinolin-1-amine 9c

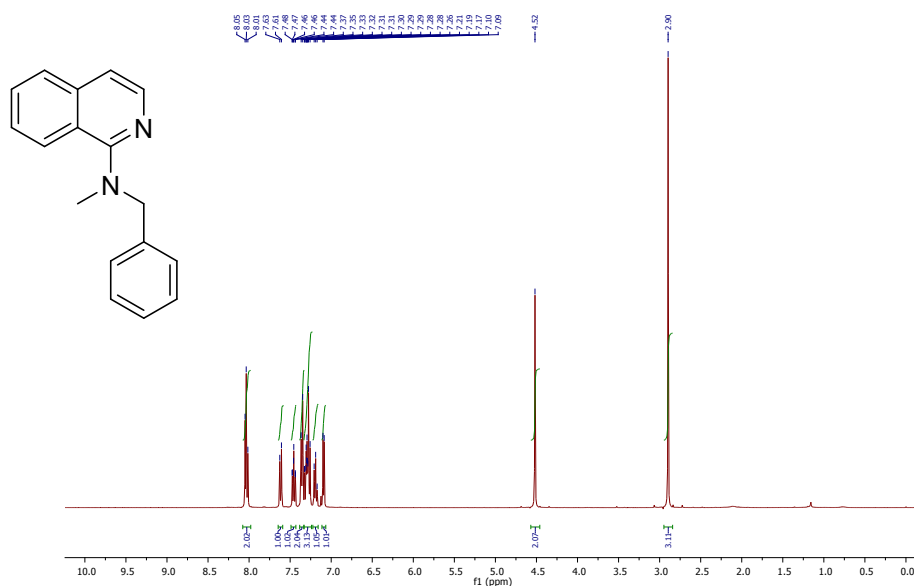

<sup>1</sup>H NMR (400 MHz, CDCl<sub>3</sub>) spectra of *N*-Benzyl-*N*-Methylisoquinolin-1-amine 9c

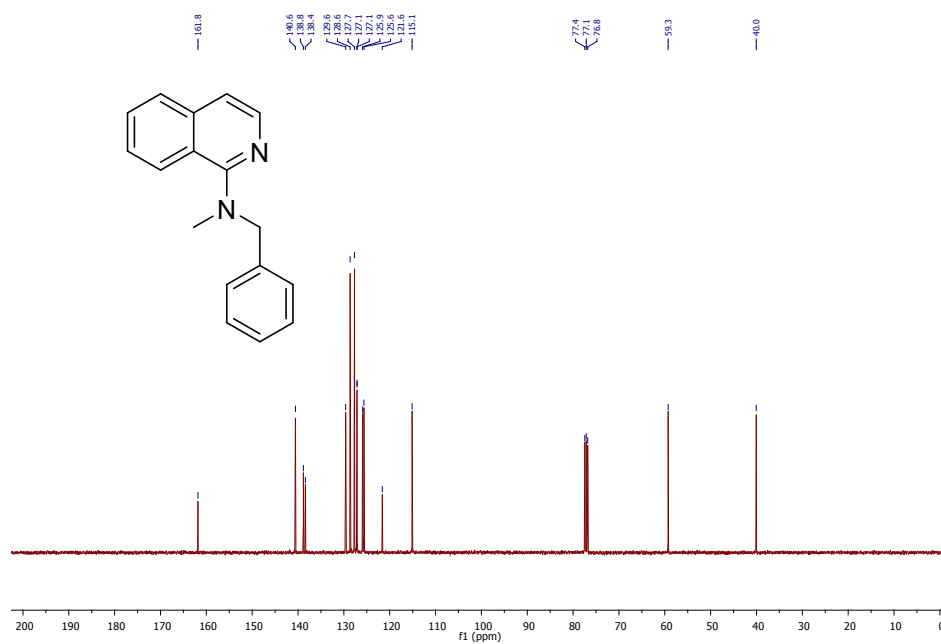

<sup>13</sup>C NMR (101 MHz, CDCl<sub>3</sub>) spectra of *N*-Benzyl-*N*-Methylisoquinolin-1-amine 9c

# *N*-Phenylisoquinolin-1-amine 9d

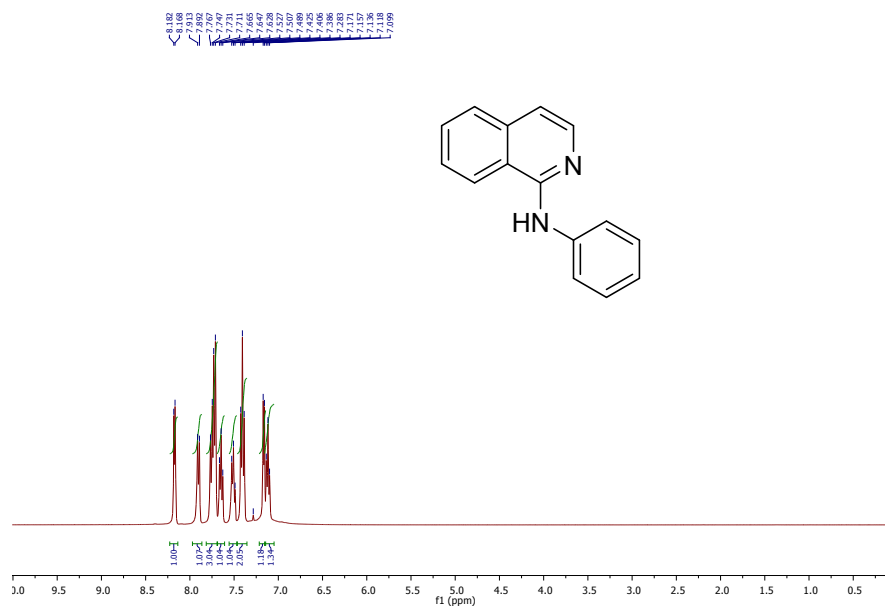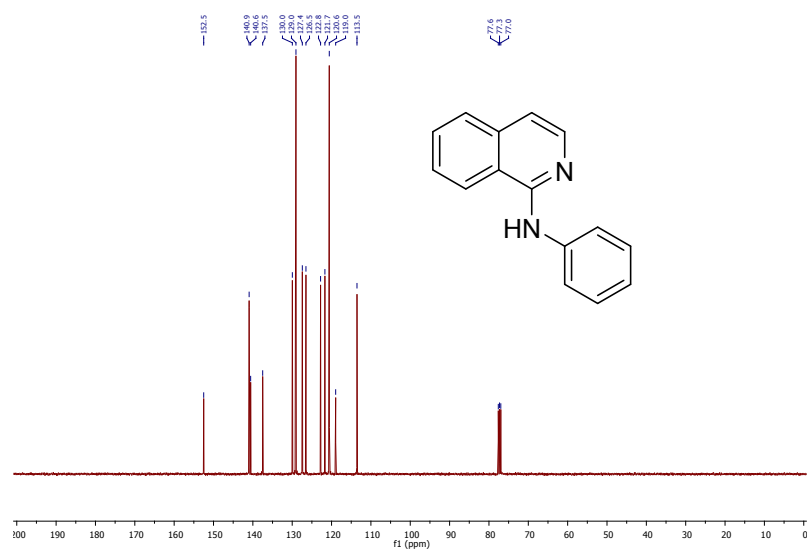

## *N*-(4-Methoxyphenyl)isoquinolin-1-amine 9e

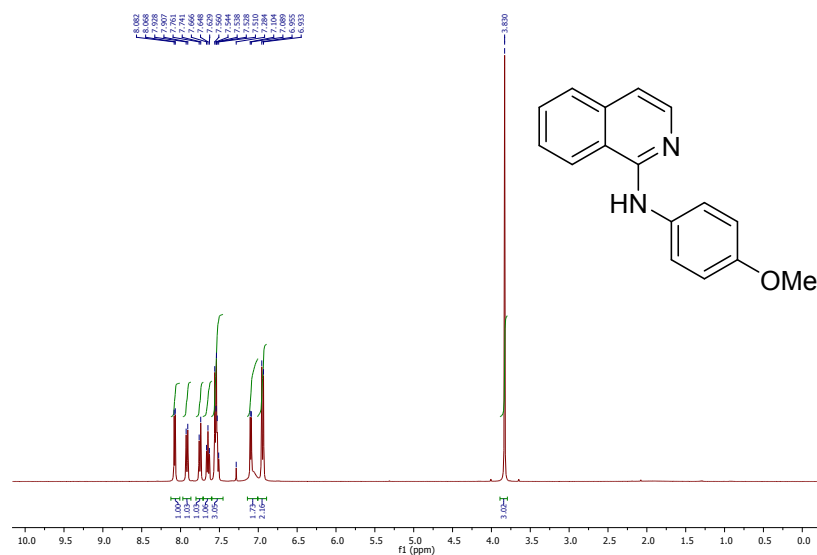

<sup>1</sup>H NMR (400 MHz, CDCl<sub>3</sub>) spectra of *N*-(4-Methoxyphenyl)isoquinolin-1-amine 9e

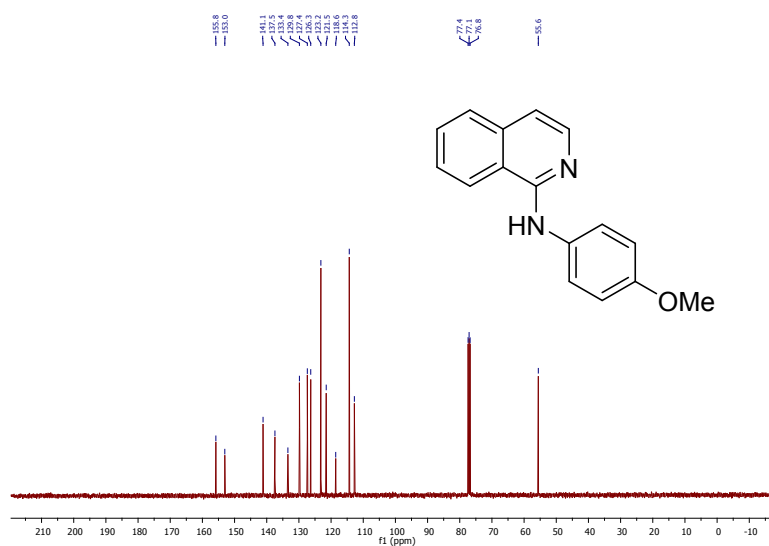

<sup>13</sup>C NMR (101 MHz, CDCl<sub>3</sub>) spectra of *N*-(4-Methoxyphenyl)isoquinolin-1-amine 9e



## *N*-(4-Nitrophenyl)isoquinolin-1-amine 9f

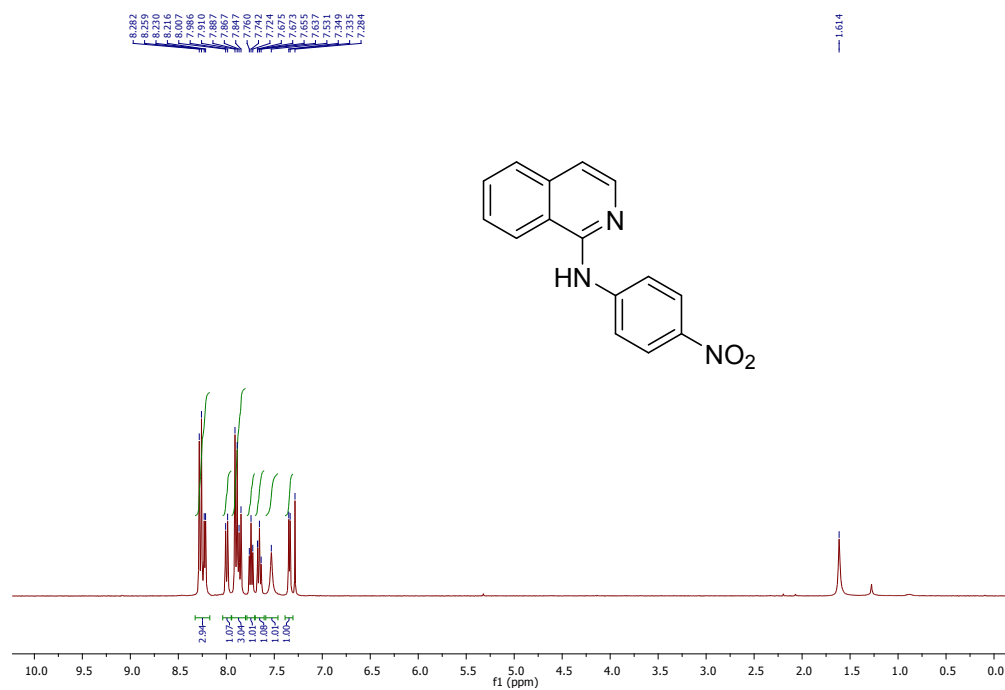

<sup>1</sup>H NMR (400 MHz, CDCl<sub>3</sub>) spectra of *N*-(4-Nitrophenyl)isoquinolin-1-amine 9f

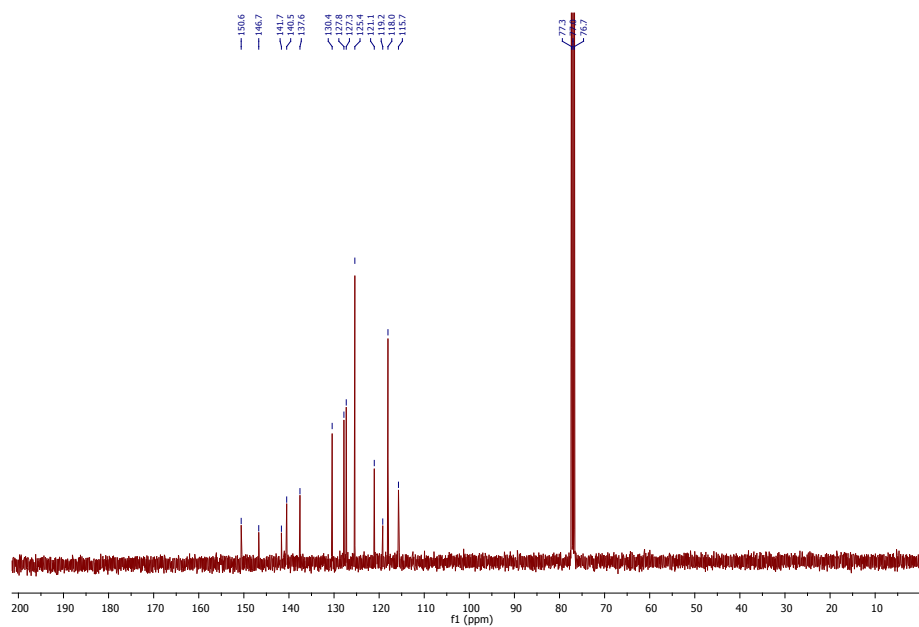

<sup>13</sup>C NMR (101 MHz, CDCl<sub>3</sub>) spectra of *N*-(4-Nitrophenyl)isoquinolin-1-amine 9f
